# Supplementary material for: Bacillus halotolerans attenuates inflammation induced by enterotoxigenic Escherichia coli infection in vivo and in vitro based on its metabolite soyasaponin I regulating the p105-Tpl2-ERK pathway
Source: Royal Society of Chemistry journal article supplement (doi:10.1039/d4fo01047g), 2024-01-01
Supplement: d4fo01047g2.xlsx [file d4fo01047g2.xlsx]

## Sheet: Table S1
Table S1 Genes and primer sequences used for quantitative real time PCR.
Gene		Sequence (5′ → 3′)	Size (bp)	Tm
MAP3K8	F-	CCGGGAGTAAACGCTTTCCA	195	55
	R-	CCCCCAAAACTTGGTTTCGC
MAP2K1	F-	CTGCAGTAGAGTCGGAGGGA	81	60
	R-	CTCTCTTGGTGCACAGCAAAC
MAPK1	F-	CTCTTGCCCACCCATACCTG	184	60
	R-	GAGCCCGTGTCCTGACAAAT
MAPK14	F-	GGACCTACAGAGAACTGCGG	185	60
	R-	GCCACTAACACCGCAGGATA
MAPK10	F-	GTTGGAGTTTGCCTGTTGCC	75	60
	R-	TCAGAGCTACCGTCAGGACA
MAPK7	F-	GGCCATAGCGCTCAAGTTCT	119	60
	R-	CGCTCTTCCGGAGGAATCTC
TNFRSF1A	F-	GCCCTTCCACCAACGTTTTC	97	60
	R-	CAAGGGCTCTTGATGGCAGA
IL1RAP	F-	GCCCAATTCAGGGACCCTAC	86	60
	R-	GGCGGGTTCAGGTACTATGG
MAPK3	F-	CCCAAAGGTGAGAGAAGCGT	70	60
	R-	ACGACAGGAACTCCATGCAC
IL-1β	F-	ATTGTCTGGGAGAAGCCAGC	90	60
	R-	TAGCCTAGGACTGGTGCCAT
IL-8	F-	TCCGTGGCTCCCAAGAATTT	85	60
	R-	TGACCAGCACAGGAATGAGG
TNF-α	F-	ATTCAGGGATGTGTGGCCTG	120	60
	R-	CCAGATGTCCCAGGTTGCAT
GAPDH	F-	AGCAATGCCTCCTGTACCAC	154	60
	R-	AAGCAGGGATGATGTTCTGG

## Sheet: Table S2
Table S2 Calculated Disease Activity Index (DAI) Scores
Score	Weight loss (%)	Stool consistency	Blood in feces
0	none	normal	normal (no bleeding)
1	1.0 - 5.0	dilute stool	normal
2	5.0 - 10.0	dilute stool	bloody stool (slight)
3	10.0 - 15.0	diarrhea (slight)	bloody stool
4	> 15.0	diarrhea (watery diarrhea)	gross bleeding

## Sheet: Table S3
Table S3 Mitogen-activated protein kinase 3 (ERK1) small interfering RNA (siRNA) oligonucleotide sequence
Gene		Sequence (5′ → 3′)
si-ERK1#1	F-	GCAUGGUCAGCUCAGCUUATT
	R-	UAAGCUGAGCUGACCAUGCTT
si-ERK1#2	F-	GACCGGAUGUUGACCUUUATT
	R-	UAAAGGUCAACAUCCGGUCTT
