# Supplementary figures and images for: Bacillus halotolerans attenuates inflammation induced by enterotoxigenic Escherichia coli infection in vivo and in vitro based on its metabolite soyasaponin I regulating the p105-Tpl2-ERK pathway
Source: Royal Society of Chemistry journal article supplement (doi:10.1039/d4fo01047g), 2024-01-01

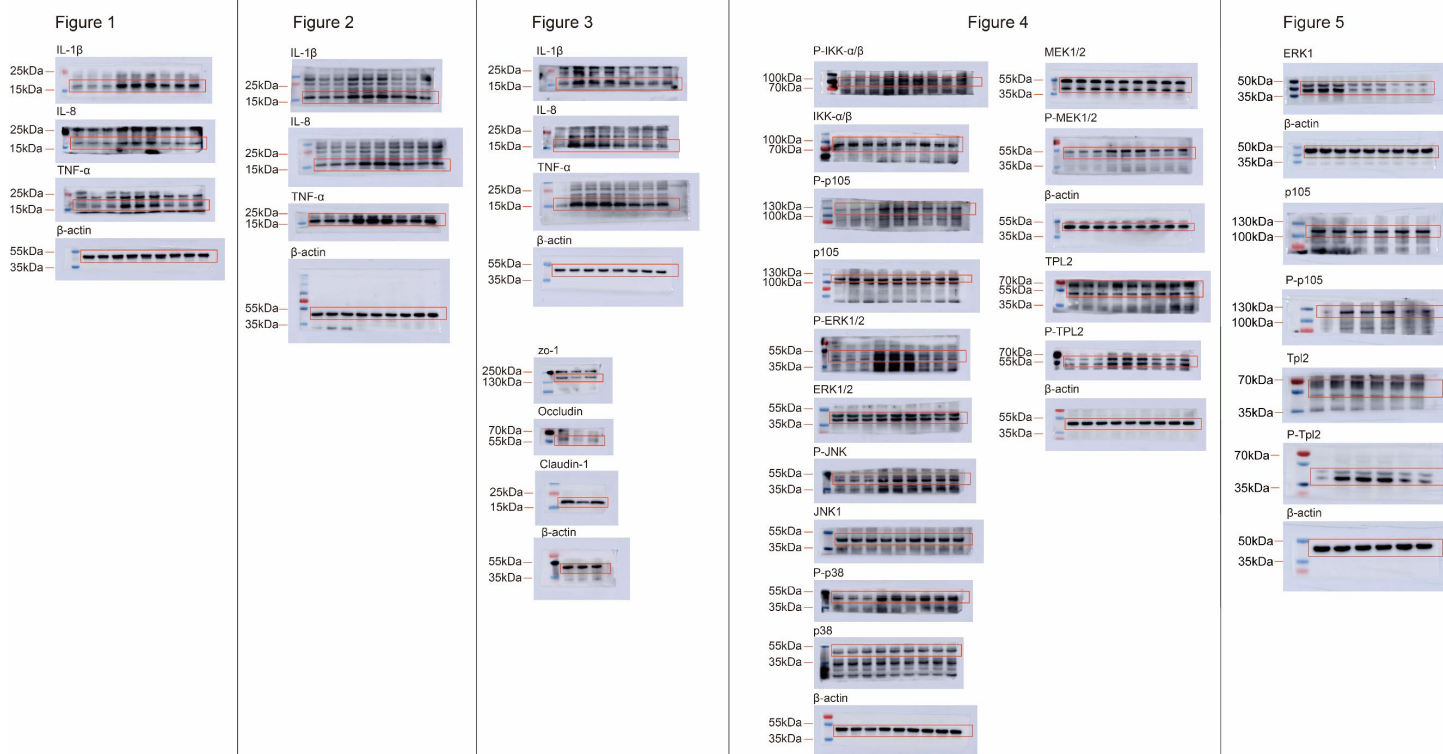

CAS NO.: 51330-27-9, Pyridine

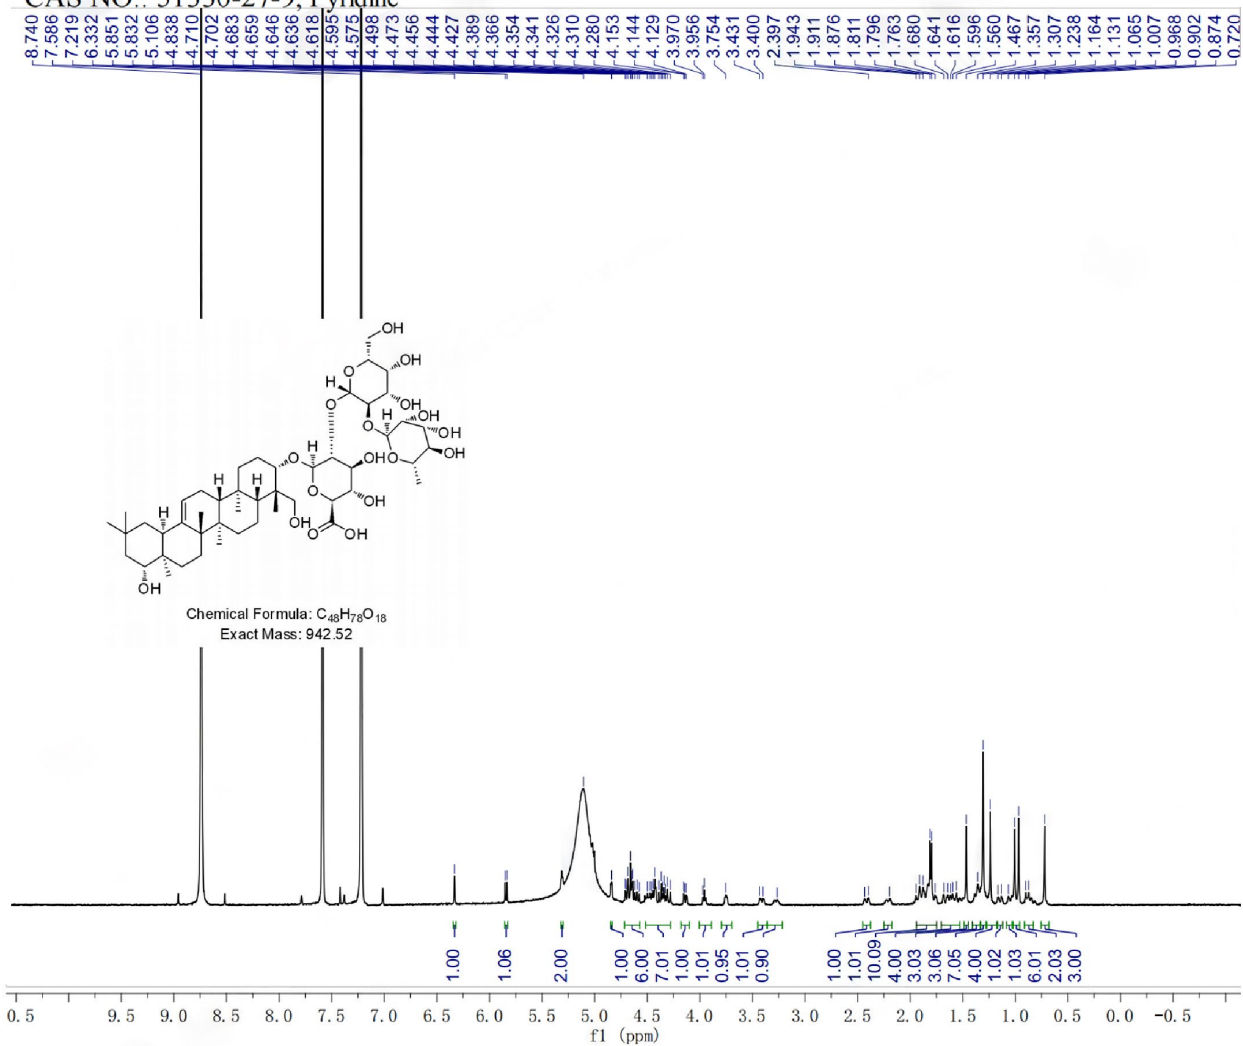

Supplement: d4fo01047g1.pdf [file d4fo01047g1.pdf]
